# Supplementary material for: Protection from Omicron infection in residents of nursing and retirement homes in Ontario, Canada
Source: bioRxiv or medRxiv preprint supplement (doi:10.1101/2022.06.28.22277016), 2022-06-29
Supplement: Supplementary file [file media-1.pdf]

**Supplementary Figure 1. Alternate antibody threshold Kaplan-Meier curves and Cox regression analyses of risk of Omicron infection in nursing and retirement homes.**

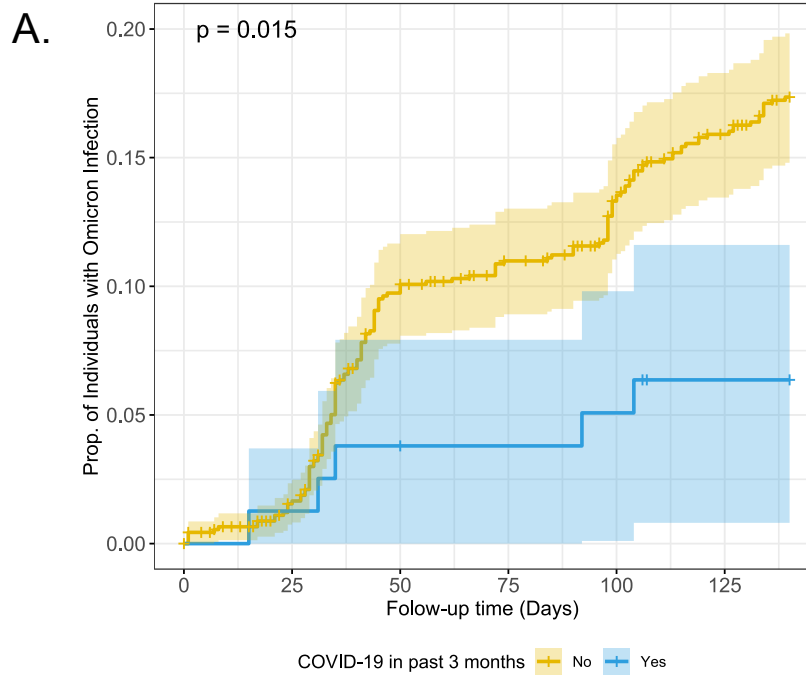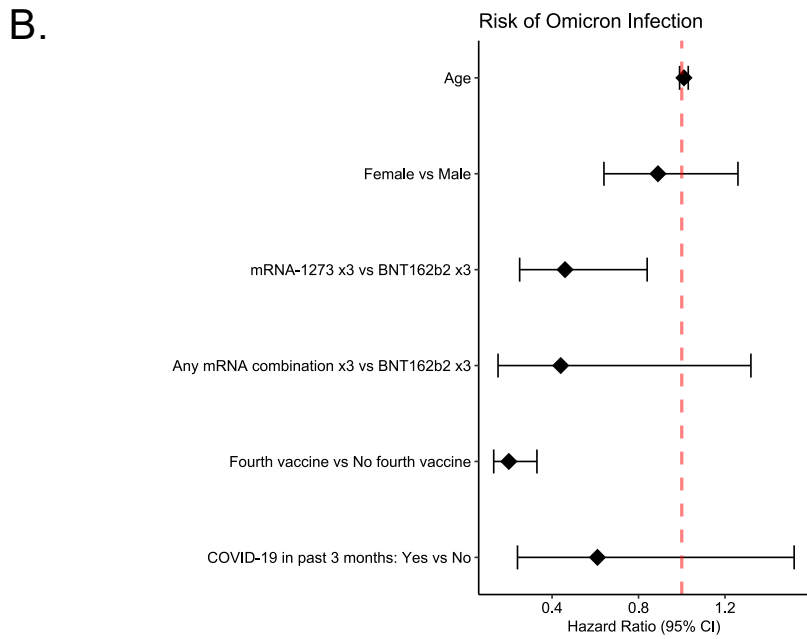

(A) Kaplan-Meier curve of incidence of Omicron infection in nursing and retirement homes by recent SARS-CoV-2 infection. (B) Cox regression of factors contributing to risk of Omicron infection in nursing and retirement homes. Anti-nucleocapsid seropositivity threshold was set at 0.642.

**Supplementary Table 1. Analysis of maximum likelihood estimates of risk of Omicron infection in nursing and retirement homes.**

| <b>Parameter</b>                                     | <b>Estimate</b> | <b>Standard Error</b> | <b>Chi-Square</b> | <b>Pr &gt; ChiSq</b> | <b>Hazard Ratio</b> | <b>95% Hazard Ratio Confidence Limits</b> |      |
|------------------------------------------------------|-----------------|-----------------------|-------------------|----------------------|---------------------|-------------------------------------------|------|
| <b>Age</b>                                           | 0.0057          | 0.0088                | 0.43              | 0.51                 | 1.01                | 0.99                                      | 1.02 |
| <b>Sex</b><br>(Female vs Male)                       | -0.035          | 0.17                  | 0.044             | 0.83                 | 0.97                | 0.70                                      | 1.34 |
| <b>Vaccine Type</b><br>(mRNA-1273 x3 vs BNT162b2 x3) | -0.63           | 0.27                  | 5.48              | 0.019                | 0.53                | 0.31                                      | 0.90 |
| <b>Vaccine Type</b><br>(mRNA x3 vs BNT162b2 x3)      | -0.61           | 0.50                  | 1.49              | 0.22                 | 0.54                | 0.21                                      | 1.45 |
| <b>Fourth mRNA Vaccine</b><br>(Yes vs No)            | -1.65           | 0.23                  | 49.82             | <0.001               | 0.19                | 0.12                                      | 0.30 |
| <b>COVID-19 in past 3 months</b><br>(Yes vs No)      | -0.66           | 0.33                  | 3.96              | 0.047                | 0.52                | 0.27                                      | 0.99 |

**Supplementary Table 2. Alternate antibody threshold study cohort characteristics.**

| <b>Antibody Threshold 0.642</b>  |                    |                           |                    |          |
|----------------------------------|--------------------|---------------------------|--------------------|----------|
|                                  | <b>Total</b>       | <b>Omicron Infection?</b> |                    | <b>P</b> |
|                                  |                    | <b>Yes</b>                | <b>No</b>          |          |
|                                  | <b>(N = 987)</b>   | <b>(N = 152)</b>          | <b>(N = 835)</b>   |          |
| <b>Age</b>                       |                    |                           |                    |          |
| Mean (SD)                        | 84.6 (9.94)        | 85.2 (9.00)               | 84.4 (10.1)        | 0.41     |
| Median (IQR)                     | 87.0 (80.0 – 91.0) | 87.0 (80.0 – 92.0)        | 87.0 (80.0 – 91.0) | 0.54     |
| <b>Sex</b>                       |                    |                           |                    |          |
| Female                           | 664 (66.6%)        | 102 (65.0%)               | 562 (66.9%)        | 0.64     |
| Male                             | 333 (33.4%)        | 55 (35.0%)                | 278 (33.1%)        |          |
| <b>Vaccine combination</b>       |                    |                           |                    |          |
| mRNA-1273 x3                     | 420 (42.1%)        | 36 (22.9%)                | 384 (45.7%)        | <0.001   |
| BNT162b2 x3                      | 478 (47.9%)        | 114 (72.6%)               | 364 (43.3%)        |          |
| mRNA combination x3              | 99 (9.93%)         | 7 (4.46%)                 | 92 (11.0%)         |          |
| <b>COVID-19 in past 3 months</b> |                    |                           |                    |          |
| No                               | 918 (92.1%)        | 152 (96.8%)               | 766 (91.2%)        | 0.017    |
| Yes                              | 79 (7.92%)         | 5 (3.18%)                 | 74 (8.81%)         |          |

**Supplementary Table 3. Alternate antibody threshold analysis of maximum likelihood estimates of risk of Omicron infection in nursing and retirement homes.**

| <b>Antibody Threshold 0.642</b>                      |                 |                       |                   |                      |                     |                                           |      |
|------------------------------------------------------|-----------------|-----------------------|-------------------|----------------------|---------------------|-------------------------------------------|------|
| <b>Parameter</b>                                     | <b>Estimate</b> | <b>Standard Error</b> | <b>Chi-Square</b> | <b>Pr &gt; ChiSq</b> | <b>Hazard Ratio</b> | <b>95% Hazard Ratio Confidence Limits</b> |      |
| <b>Age</b>                                           | 0.012           | 0.0094                | 1.54              | 0.22                 | 1.01                | 0.99                                      | 1.03 |
| <b>Sex</b><br>(Female vs Male)                       | -0.11           | 0.17                  | 0.39              | 0.54                 | 0.90                | 0.64                                      | 1.26 |
| <b>Vaccine Type</b><br>(mRNA-1273 x3 vs BNT162b2 x3) | -0.78           | 0.31                  | 6.31              | 0.012                | 0.46                | 0.25                                      | 0.84 |
| <b>Vaccine Type</b><br>(mRNA x3 vs BNT162b2 x3)      | -0.82           | 0.56                  | 2.16              | 0.14                 | 0.44                | 0.15                                      | 1.32 |
| <b>Fourth mRNA Vaccine</b><br>(Yes vs No)            | -1.60           | 0.25                  | 42.89             | <0.001               | 0.20                | 0.13                                      | 0.33 |
| <b>COVID-19 in past 3 months</b><br>(Yes vs No)      | -0.50           | 0.47                  | 1.14              | 0.29                 | 0.61                | 0.24                                      | 1.52 |
